# Supplementary material for: Novel Variations in Native Ethiopian Goat breeds PRNP Gene and Their Potential Effect on Prion Protein Stability
Source: PubMed Central journal article supplement (PMC7181617; doi:10.1038/s41598-020-63874-z), 2020-04-24
Supplement: 41598_2020_63874_MOESM2_ESM.pdf [file 41598_2020_63874_MOESM2_ESM.pdf]

**Novel Variations in Native Ethiopian Goat breeds Prnp Gene and Their Potential Effect on Prion Protein Stability**

Eden Yitna Teferedegn<sup>1</sup>, Yalcin Yaman<sup>2</sup> and Cemal Un1\*

**Table 1 Haplotype**

|         |   | HAPLOTYPE 1 |       |       |     |     |     |     |
|---------|---|-------------|-------|-------|-----|-----|-----|-----|
|         |   | 67NOV       | 68NOV | 69NOV | 127 | 138 | 143 | 146 |
| AfCap01 | ? | G           | W     | G     | G   | S   | H   | N   |
| AfCap02 | ? | G           | R     | G     | G   | S   | H   | S   |
| AfCap03 | ? | G           | W     | G     | G   | S   | H   | S   |
| AfCap04 | ? | G           | W     | G     | G   | S   | H   | S   |
| AfCap05 | ? | G           | W     | G     | G   | S   | H   | S   |
| AfCap06 | ? | G           | W     | G     | G   | S   | H   | N   |
| AfCap07 | ? | G           | R     | G     | G   | S   | H   | N   |
| AfCap08 | ? | G           | R     | G     | G   | S   | H   | S   |
| AfCap09 | ? | G           | W     | G     | G   | S   | H   | N   |
| AfCap10 | ? | G           | W     | G     | G   | S   | H   | N   |
| AfCap11 | ? | G           | R     | G     | G   | S   | H   | N   |
| AfCap12 | ? | G           | W     | G     | G   | S   | H   | S   |
| AfCap13 | ? | G           | W     | G     | G   | S   | H   | N   |
| AfCap14 | ? | G           | W     | G     | G   | S   | H   | S   |
| AfCap15 | ? | G           | W     | G     | G   | S   | H   | N   |
| AfCap16 | ? | G           | W     | G     | G   | S   | H   | S   |
| AfCap17 | ? | G           | W     | G     | G   | S   | H   | S   |
| AfCap18 | ? | G           | W     | G     | G   | S   | H   | N   |
| AfCap19 | ? | G           | W     | G     | G   | S   | H   | N   |
| AfCap20 | ? | G           | R     | G     | A   | S   | H   | N   |
| AfCap23 | ? | G           | W     | G     | G   | S   | H   | S   |
| AfCap24 | ? | G           | W     | G     | G   | S   | H   | S   |
| AfCap25 | ? | S           | R     | G     | G   | S   | H   | N   |
| AfCap26 | ? | S           | R     | G     | G   | S   | H   | S   |
| AfCap27 | ? | G           | W     | G     | G   | S   | H   | S   |
| AfCap28 | ? | G           | W     | G     | G   | S   | H   | S   |
| AfCap29 | ? | G           | W     | G     | G   | S   | H   | N   |
| AfCap30 | ? | G           | W     | G     | G   | S   | H   | S   |
| AfCap31 | ? | G           | W     | G     | G   | S   | H   | S   |
| AfCap35 | ? | G           | W     | G     | G   | S   | H   | N   |
| AfCap36 | ? | G           | W     | G     | G   | S   | H   | S   |
| AfCap37 | ? | G           | W     | G     | G   | S   | H   | N   |
| AfCap38 | ? | G           | R     | G     | G   | S   | H   | N   |
| AfCap39 | ? | G           | W     | G     | G   | S   | H   | S   |
| AfCap40 | ? | G           | W     | G     | G   | S   | H   | N   |
| ArCap01 | ? | S           | R     | D     | G   | S   | H   | N   |
| ArCap02 | ? | S           | R     | D     | G   | S   | H   | N   |
| ArCap03 | ? | G           | W     | G     | G   | S   | H   | S   |
| ArCap05 | ? | S           | R     | D     | A   | S   | H   | N   |
| ArCap06 | ? | G           | W     | G     | G   | S   | H   | N   |

|         |   |   |   |   |   |   |   |   |
|---------|---|---|---|---|---|---|---|---|
| ArCap07 | ? | G | W | G | G | S | H | S |
| ArCap08 | ? | G | W | G | G | S | H | S |
| ArCap09 | ? | G | W | G | G | S | H | S |
| ArCap10 | ? | G | W | G | G | S | H | N |
| ArCap11 | ? | G | W | G | G | S | H | N |
| ArCap12 | ? | G | W | G | G | S | H | N |
| ArCap13 | ? | G | W | G | G | S | H | N |
| ArCap14 | ? | G | W | G | G | S | H | S |
| ArCap15 | ? | G | W | G | G | S | H | S |
| ArCap16 | ? | G | W | G | G | S | H | S |
| ArCap17 | ? | G | W | G | G | S | H | S |
| ArCap18 | ? | G | W | G | G | S | H | S |
| ArCap19 | ? | G | W | G | G | S | H | S |
| ArCap20 | ? | G | W | G | G | S | H | N |
| ArCap21 | ? | G | W | G | G | S | H | S |
| ArCap22 | ? | G | W | G | G | S | H | N |
| ArCap23 | ? | G | W | G | G | S | H | S |
| ArCap24 | ? | G | W | G | G | S | H | N |
| ArCap25 | ? | G | W | G | G | S | H | N |
| ArCap26 | ? | G | W | G | G | S | H | N |
| ArCap27 | ? | G | W | G | G | S | H | N |
| ArCap28 | ? | G | W | G | G | S | H | N |
| ArCap29 | ? | G | W | G | G | S | H | S |
| ArCap30 | ? | G | W | G | G | S | H | S |
| ArCap31 | ? | G | W | G | G | S | H | N |
| ArCap32 | ? | G | W | G | G | S | H | N |
| ArCap33 | ? | G | W | G | G | S | H | N |
| ArCap34 | ? | G | W | G | G | S | H | N |
| ArCap35 | ? | G | W | G | G | S | H | N |
| ArCap36 | ? | G | W | G | G | S | H | N |
| ArCap37 | ? | G | W | G | G | S | H | S |
| ArCap38 | ? | G | W | G | G | S | H | N |
| ArCap39 | ? | G | W | G | G | S | H | S |
| ArCap40 | ? | G | W | G | G | S | H | N |

AfCap-Afar Caprine, ArCap-Arsi Caprine

\*Haplotype Blockf from the Each partent (HAPLOTYPE 1 ve 2)

\* \*Coloured columns are MONOMORPHIC locus

\*\*\*Last column best prediction







|   |   |   |   |   |   |   |
|---|---|---|---|---|---|---|
| S | H | S | R | R | T | P |
| S | H | N | R | R | T | S |
| S | H | N | R | R | I | P |
| S | H | N | R | R | T | S |
| S | H | N | R | R | T | S |
| S | H | N | R | R | T | P |
| S | H | S | R | R | T | P |
| S | H | S | R | R | T | P |
| S | H | N | R | R | I | P |
| S | H | N | R | R | T | S |
| S | H | S | R | R | T | P |
| S | H | N | R | R | T | S |
| S | H | N | R | R | T | P |
| S | H | N | R | R | T | P |
| S | H | N | R | R | T | S |
| S | H | N | R | R | T | P |
| S | H | N | R | R | T | P |
| S | H | N | R | R | T | P |
| S | H | N | R | R | T | S |
| S | H | N | R | R | T | S |
| S | H | N | R | R | T | P |
| S | H | N | R | R | T | P |
| S | H | N | R | R | I | P |
| S | H | N | R | R | I | P |
| S | H | N | R | R | T | S |
| S | H | S | R | R | T | P |
| S | H | N | R | R | T | P |

,

| HAPLOTYPE 1   | HAPLOTYPE 2   | POSTPROBABILITY |
|---------------|---------------|-----------------|
| GWGGSHNR RTP  | GRGGSHSRH TP  | 1               |
| GRGGSHSR RTP  | GWGGSHNR RTS  | 1               |
| GWGGSHSR RTP  | GRGGSHSR RTS  | 1               |
| GWGGSHSR RTP  | GRGGSHNR RIP  | 0.5914          |
| GWGGSHSR RTP  | GRGGSHNR RTP  | 0.6887          |
| GWGGSHNR RTP  | GRGGSHNR RTP  | 1               |
| GRGGSHNR RTP  | GWGGSHNR RTS  | 1               |
| GRGGSHSR RTP  | GWGGSHNR HRTS | 0.9237          |
| GWGGSHNR RTS  | GWGGSHNR HRTS | 0.5             |
| GWGGSHNR RTP  | GWGGSHNR RTS  | 1               |
| GRGGSHNR RTP  | GWGGSHNR RTS  | 1               |
| GWGGSHSR RTP  | GRGGSHNR RTP  | 0.6887          |
| GWGGSHNR RTP  | GRGGSHNR RTP  | 1               |
| GWGGSHSR RTP  | GWGGSHNR HRTP | 0.5             |
| GWGGSHNR RIP  | GRGGSHNR RIP  | 1               |
| GWGGSHSR RTP  | GRGGSHNR RTP  | 0.6887          |
| GWGGSHSR RTP  | GRGGSHSR RTP  | 1               |
| GWGGSHNR RTP  | GRGGSHNR RTP  | 1               |
| GWGGSHNR RTP  | GRGGSHNR RTP  | 1               |
| GRGASHNR RTP  | GWGGSHSR RTP  | 0.5848          |
| GWGGSHSR RTP  | GRGGSHNR RTP  | 0.6887          |
| GWGGSHSR RTP  | GRGGSHNR RTP  | 0.6887          |
| SRGGSHNR HRTP | GWGGSHNR RTP  | 1               |
| SRGGSHSR RTP  | GWGGSHSR RTP  | 1               |
| GWGGSHSR RTP  | GRGGSHNR RTP  | 0.6887          |
| GWGGSHSR RTP  | GRGGSHNR RTP  | 0.6887          |
| GWGGSHNR RTP  | GRGGSHSR HTP  | 1               |
| GWGGSHSR RTP  | GRGGSHNR RTP  | 0.6887          |
| GWGGSHSR RTP  | GRGGSHNR RTP  | 0.6887          |
| GWGGSHNR RTP  | GWGGSHNR HRTP | 0.9742          |
| GWGGSHSR RTP  | GRGGSHNR RTP  | 0.6887          |
| GWGGSHNR RTP  | GWGGSRNR RTP  | 1               |
| GRGGSHNR RTP  | GWGGSHNR RTS  | 1               |
| GWGGSHSR RTP  | GWGGSHNR RTP  | 1               |
| GWGGSHNR RTP  | GWGGSHNR RTS  | 1               |
| SRDGSNR RTP   | GWGGSHNR RTP  | 1               |
| SRDGSNR RTP   | GWGGSHSR RTP  | 1               |
| GWGGSHSR RTP  | GWGGSHSR RTP  | 1               |
| SRDASHNR RTP  | GWGGSHNR RTP  | 1               |
| GWGGSHNR RTP  | GWGGSHSR RTP  | 0.5             |

|              |              |        |
|--------------|--------------|--------|
| GWGGSHSR RTP | GWGGSHSR RTP | 1      |
| GWGGSHSR RTP | GWGGSHNR RTS | 1      |
| GWGGSHSR RTP | GWGGSHNR RIP | 0.5    |
| GWGGSHNR RTP | GWGGSHNR RTS | 1      |
| GWGGSHNR RTS | GWGGSHNR RTS | 1      |
| GWGGSHNR RTP | GWGASHNR RTP | 1      |
| GWGGSHNR RTP | GWGGSHSR RTP | 0.5    |
| GWGGSHSR RTP | GWGGSHSR RTP | 1      |
| GWGGSHSR RTP | GWGGSHSR RTP | 1      |
| GWGGSHSR RTP | GWGGSHNR RIP | 0.5    |
| GWGGSHSR RTP | GWGGSHNR RTS | 1      |
| GWGGSHSR RTP | GWGGSHSR RTP | 1      |
| GWGGSHSR RTP | GWGGSHNR RTS | 1      |
| GWGGSHNR RTP | GWGGSHNR RTP | 1      |
| GWGGSHSR RTP | GWGGSHNR RTS | 1      |
| GWGGSHNR RTP | GWGGSHSR RTP | 0.5    |
| GWGGSHSR RTP | GWGGSHNR RTS | 1      |
| GWGGSHNR RTP | GWGGSHSR RTP | 0.5    |
| GWGGSHNR RTP | GWGGSHNR RTS | 1      |
| GWGGSHNR RTP | GWGGSHNR RTP | 1      |
| GWGGSHNR RTP | GWGGSHNR RTP | 1      |
| GWGGSHNR RTP | GWGGSHNR RTP | 1      |
| GWGGSHNR RTP | GWGGSRNR RTP | 1      |
| GWGGSHSR RTP | GRGGSHNR RTP | 0.6887 |
| GWGGSHSR RTP | GWGGSHSR RTP | 1      |
| GWGGSHNR RTP | GWGGSHSR RTP | 0.5    |
| GWGGSHNR RTP | GWGGSHNR RTS | 1      |
| GWGGSHNR RTS | GWGGSHNR RTS | 1      |
| GWGGSHNR RTP | GWGGSHNR RTP | 1      |
| GWGGSHNR RTP | GWGGSHNR RTP | 1      |
| GWGGSHNR RTP | GWGGSHNR RIP | 0.5    |
| GWGGSHSR RTP | GWGGSHNR RIP | 0.5    |
| GWGGSHNR RIP | GWGGSHNR RTS | 1      |
| GWGGSHSR RTP | GWGGSHSR RTP | 1      |
| GWGGSHNR RTP | GWGASHNR RTP | 1      |



**Table 2 Hotspot identification Proc**

Mutation score ([-1,0] for decreased amyloidogenicity and (0,1] for increased amyloidogenicity):

**Wild type sequence**

| Sr# | Startposition | sequence | score |
|-----|---------------|----------|-------|
| 1   | 10            | ILVLFVA  | 0.941 |
| 2   | 9             | WILVLFV  | 0.934 |
| 3   | 12            | VLVAMW   | 0.925 |
| 4   | 11            | LVLVAM   | 0.923 |
| 5   | 250           | LIFLIVG  | 0.919 |
| 6   | 13            | LFVAMWS  | 0.918 |
| 7   | 251           | IFLIVG   | 0.898 |
| 8   | 182           | CVNITVK  | 0.898 |
| 9   | 120           | AAGAVVG  | 0.896 |
| 10  | 14            | FVAMWSD  | 0.893 |
| 11  | 249           | FLIFLIV  | 0.886 |
| 12  | 8             | SWILVLF  | 0.881 |
| 13  | 174           | NQNNFVH  | 0.876 |
| 14  | 233           | ASVILFS  | 0.867 |
| 15  | 243           | VILLISF  | 0.856 |
| 16  | 247           | ISFLIFL  | 0.853 |
| 17  | 121           | AGAVVGG  | 0.852 |
| 18  | 7             | GSWILVL  | 0.851 |
| 19  | 123           | AVVGGLG  | 0.832 |
| 20  | 115           | VAGAAAA  | 0.826 |
| 21  | 119           | AAAGAVV  | 0.826 |
| 22  | 252           | FLIVG    | 0.814 |
| 23  | 235           | VILFSSP  | 0.808 |
| 24  | 234           | SVILFSS  | 0.808 |
| 25  | 6             | IGSWILV  | 0.805 |
| 26  | 246           | LISFLIF  | 0.801 |
| 27  | 244           | ILLISFL  | 0.801 |
| 28  | 122           | GAVVGGL  | 0.793 |
| 29  | 175           | QNNFVHD  | 0.792 |
| 30  | 248           | SFLIFLI  | 0.792 |
| 31  | 232           | GASVILF  | 0.777 |
| 32  | 124           | VVGGLGG  | 0.768 |
| 33  | 212           | VVEQMCI  | 0.729 |

**Novel Variant substituted sequence only at oc**

| Sr# | Startposition | sequence | score |
|-----|---------------|----------|-------|
| 1   | 10            | ILVLFVA  | 0.941 |
| 2   | 9             | WILVLFV  | 0.934 |
| 3   | 12            | VLVAMW   | 0.925 |
| 4   | 11            | LVLVAM   | 0.923 |
| 5   | 250           | LIFLIVG  | 0.919 |
| 6   | 13            | LFVAMWS  | 0.918 |
| 7   | 251           | IFLIVG*  | 0.898 |
| 8   | 182           | CVNITVK  | 0.898 |
| 9   | 120           | AAGAVVG  | 0.896 |
| 10  | 14            | FVAMWSD  | 0.893 |
| 11  | 249           | FLIFLIV  | 0.886 |
| 12  | 8             | SWILVLF  | 0.881 |
| 13  | 174           | NQNNFVH  | 0.876 |
| 14  | 233           | ASVILFS  | 0.867 |
| 15  | 243           | VILLISF  | 0.856 |
| 16  | 247           | ISFLIFL  | 0.853 |
| 17  | 121           | AGAVVGG  | 0.852 |
| 18  | 7             | GSWILVL  | 0.851 |
| 19  | 123           | AVVGGLG  | 0.832 |
| 20  | 115           | VAGAAAA  | 0.826 |
| 21  | 119           | AAAGAVV  | 0.826 |
| 22  | 252           | FLIVG*   | 0.814 |
| 23  | 235           | VILFSSP  | 0.808 |
| 24  | 234           | SVILFSS  | 0.808 |
| 25  | 6             | IGSWILV  | 0.805 |
| 26  | 246           | LISFLIF  | 0.801 |
| 27  | 244           | ILLISFL  | 0.801 |
| 28  | 122           | GAVVGGL  | 0.793 |
| 29  | 175           | QNNFVHD  | 0.792 |
| 30  | 248           | SFLIFLI  | 0.792 |
| 31  | 232           | GASVILF  | 0.777 |
| 32  | 124           | VVGGLGG  | 0.768 |

34 245 LLISFLI 0.725  
35 116 AGAAAAG 0.721  
36 118 AAAAGAV 0.721  
37 5 HIGSWIL 0.714  
38 173 SNQNNFV 0.714  
39 114 HVAGAAA 0.711  
40 217 CITQYQR 0.678  
41 216 MCITQYQ 0.676  
42 178 FVHDCVN 0.665  
43 215 QMCITQY 0.661  
44 213 VEQMCIT 0.660  
45 172 YSNQNNF 0.658  
46 225 SQAYYQR 0.650  
47 141 LIHFGND 0.647  
48 117 GAAAAGA 0.633  
49 15 VAMWSDV 0.613  
50 16 AMWSDVG 0.613  
51 179 VHDCVNI 0.606  
52 131 YMLGSAM 0.552  
53 4 SHIGSWI 0.550  
54 125 VGGLGGY 0.546  
55 98 SHSQWNK 0.545  
56 132 MLGSAMS 0.532  
57 181 DCVNITV 0.531  
58 55 QGGGGWG 0.530  
59 92 GWGQGG 0.530  
60 91 GGWGQGG 0.530  
61 81 GGGWGQP 0.530  
62 73 GGGWGQP 0.530  
**63 65 GGGWGQP 0.530**  
64 57 GGGWGQP 0.530  
65 90 GGGWGQG 0.530  
66 180 HDCVNIT 0.526  
67 93 WGQGGSH 0.523  
68 128 LGGYMLG 0.522  
69 17 MWSDVGL 0.513  
70 177 NFVHDCV 0.511

33 212 VVEQMCI 0.729  
34 245 LLISFLI 0.725  
35 116 AGAAAAG 0.721  
36 118 AAAAGAV 0.721  
37 5 HIGSWIL 0.714  
38 173 SNQNNFV 0.714  
39 114 HVAGAAA 0.711  
40 253 LIVG\* 0.698  
41 217 CITQYQR 0.678  
42 216 MCITQYQ 0.676  
43 178 FVHDCVN 0.665  
44 215 QMCITQY 0.661  
45 213 VEQMCIT 0.660  
46 172 YSNQNNF 0.658  
47 225 SQAYYQR 0.650  
48 141 LIHFGND 0.647  
49 117 GAAAAGA 0.633  
50 15 VAMWSDV 0.613  
51 16 AMWSDVG 0.613  
52 179 VHDCVNI 0.606  
53 131 YMLGSAM 0.552  
54 4 SHIGSWI 0.550  
55 125 VGGLGGY 0.546  
56 98 SHSQWNK 0.545  
57 132 MLGSAMS 0.532  
58 181 DCVNITV 0.531  
59 55 QGGGGWG 0.530  
60 92 GWGQGG 0.530  
61 91 GGWGQGG 0.530  
62 81 GGGWGQP 0.530  
63 73 GGGWGQP 0.530  
64 57 GGGWGQP 0.530  
65 90 GGGWGQG 0.530  
66 180 HDCVNIT 0.526  
67 93 WGQGGSH 0.523  
68 128 LGGYMLG 0.522  
69 17 MWSDVGL 0.513

71 183 VNITVKQ 0.509  
72 18 WSDVGLC 0.506  
73 176 NNFVHDC 0.501  
74 242 PVILLIS 0.497  
75 33 GWNTGGS 0.491  
76 32 GGWNTGG 0.491  
77 31 GGGWNTG 0.491  
78 34 WNTGGSR 0.484  
79 127 GLGGYML 0.458  
80 129 GGYMLGS 0.458  
81 89 GGGGWGQ 0.456  
82 56 GGGGWGQ 0.456  
83 97 GSHSQWN 0.454  
84 133 LGSAMSR 0.453  
85 130 GYMLGSA 0.450  
86 162 NQVYYRP 0.414  
87 80 HGGGWGQ 0.396  
88 72 HGGGWGQ 0.396  
**89 64 HGGGWGQ 0.396**  
90 88 HGGGGWG 0.396  
91 126 GGLGGYM 0.387  
92 19 SDVGLCK 0.384  
93 160 YPNQVYY 0.378  
94 161 PNQVYYR 0.378  
95 214 EQMCITQ 0.360  
96 224 ESQAYYQ 0.350  
97 184 NITVKQH 0.337  
98 231 RGASVIL 0.335  
99 142 IHFGNDY 0.334  
100 189 QHTVTTT 0.332  
101 208 IMERVVE 0.330  
102 187 VKQHTVT 0.276  
103 111 NMKHVAG 0.273  
104 143 HFGNDYE 0.267  
105 226 QAYYQRG 0.265  
106 94 GQGGSHS 0.257  
107 230 QRGASVI 0.255

70 177 NNFVHDCV 0.511  
71 183 VNITVKQ 0.509  
72 18 WSDVGLC 0.506  
73 176 NNFVHDC 0.501  
74 242 PVILLIS 0.497  
75 33 GWNTGGS 0.491  
76 32 GGWNTGG 0.491  
77 31 GGGWNTG 0.491  
78 34 WNTGGSR 0.484  
79 127 GLGGYML 0.458  
80 129 GGYMLGS 0.458  
81 89 GGGGWGQ 0.456  
82 56 GGGGWGQ 0.456  
83 97 GSHSQWN 0.454  
84 133 LGSAMSR 0.453  
85 130 GYMLGSA 0.450  
86 162 NQVYYRP 0.414  
87 80 HGGGWGQ 0.396  
88 72 HGGGWGQ 0.396  
89 88 HGGGGWG 0.396  
90 126 GGLGGYM 0.387  
91 19 SDVGLCK 0.384  
92 160 YPNQVYY 0.378  
93 161 PNQVYYR 0.378  
94 214 EQMCITQ 0.360  
95 224 ESQAYYQ 0.350  
96 184 NITVKQH 0.337  
97 231 RGASVIL 0.335  
98 142 IHFGNDY 0.334  
99 189 QHTVTTT 0.332  
100 208 IMERVVE 0.330  
101 187 VKQHTVT 0.276  
102 111 NMKHVAG 0.273  
103 143 HFGNDYE 0.267  
104 226 QAYYQRG 0.265  
105 94 GQGGSHS 0.257  
106 230 QRGASVI 0.255

108 95 QGGSHSQ 0.251  
109 96 GGSQHSW 0.251  
110 211 RVVEQMC 0.251  
111 1 MVKSHIG 0.249  
112 191 TVTTTTK 0.231  
113 190 HTVTTTT 0.227  
114 113 KHVAGAA 0.226  
115 185 ITVKQHT 0.216  
116 228 YYQRGAS 0.211  
117 227 AYYQRGA 0.211  
118 218 ITQYQRE 0.208  
119 112 MKHVAGA 0.206  
120 171 RYSNQNN 0.200  
121 2 VKSHIGS 0.199  
122 236 ILFSSPP 0.198  
123 99 HSQWNKP 0.180  
124 140 PLIHFGN 0.170  
125 110 TNMKHVA 0.166  
126 30 PGGGWNT 0.164  
127 82 GGWGQPH 0.154  
128 74 GGWGQPH 0.154  
**129 66 GGWGQPH 0.154**  
130 58 GGWGQPH 0.154  
131 144 FGNDYED 0.154  
132 229 YQRGASV 0.153  
133 164 VYYRPVD 0.139  
134 84 WGQPHGG 0.125  
135 76 WGQPHGG 0.125  
**136 68 WGQPHGG 0.125**  
**137 60 WGQPHGG 0.125**  
138 83 GWGQPHG 0.125  
139 75 GWGQPHG 0.125  
**140 67 GWGQPHG 0.125**  
141 59 GWGQPHG 0.125  
142 169 VDRYSNQ 0.111  
143 134 GSAMSRP 0.107  
144 20 DVGLCKK 0.103

107 95 QGGSHSQ 0.251  
108 96 GGSQHSW 0.251  
109 211 RVVEQMC 0.251  
110 1 MVKSHIG 0.249  
111 191 TVTTTTK 0.231  
112 190 HTVTTTT 0.227  
113 113 KHVAGAA 0.226  
114 185 ITVKQHT 0.216  
115 228 YYQRGAS 0.211  
116 227 AYYQRGA 0.211  
117 218 ITQYQRE 0.208  
118 112 MKHVAGA 0.206  
119 171 RYSNQNN 0.200  
120 2 VKSHIGS 0.199  
121 236 ILFSSPP 0.198  
122 99 HSQWNKP 0.180  
123 140 PLIHFGN 0.170  
124 110 TNMKHVA 0.166  
125 30 PGGGWNT 0.164  
126 82 GGWGQPH 0.154  
127 74 GGWGQPH 0.154  
128 58 GGWGQPH 0.154  
129 144 FGNDYED 0.154  
130 229 YQRGASV 0.153  
131 164 VYYRPVD 0.139  
132 84 WGQPHGG 0.125  
133 76 WGQPHGG 0.125  
134 60 WGQPHGG 0.125  
135 83 GWGQPHG 0.125  
136 75 GWGQPHG 0.125  
137 59 GWGQPHG 0.125  
138 169 VDRYSNQ 0.111  
139 134 GSAMSRP 0.107  
140 20 DVGLCKK 0.103  
141 186 TVKQHTV 0.100  
142 188 KQHTVTT 0.100  
143 198 GENFTET 0.099

145 186 TVKQHTV 0.100  
146 188 KQHTVTT 0.100  
147 198 GENFTET 0.099  
148 201 FTETDIK 0.099  
149 79 PHGGGWG 0.096  
150 71 PHGGGWG 0.096  
**151 63 PHGGGWG 0.096**  
152 41 YPGQGSP 0.094  
153 152 YYRENNY 0.090  
154 153 YRENNYR 0.090  
155 155 ENMYRYP 0.090  
156 210 ERVVEQM 0.089  
157 209 MERVVEQ 0.088  
158 204 TDIKIME 0.082  
159 199 ENFTETD 0.081  
160 3 KSHIGSW 0.081  
161 241 PPVILLI 0.075  
162 200 NFTETDI 0.074  
163 159 RYPNQVY 0.073  
164 163 QVYYRPV 0.073  
165 45 GSPGGNR 0.071  
166 54 PQGGGGW 0.069  
167 44 QGSPGGN 0.067  
168 43 GQGSPGG 0.067  
169 35 NTGGSRY 0.066  
170 36 TGGSRYP 0.066  
171 223 RESQAYY 0.065  
172 192 VTTTTKG 0.063  
173 222 QRESQAY 0.061  
174 221 YQRESQA 0.059  
175 220 QYQRESQ 0.059  
176 170 DRYSNQN 0.058  
177 240 SPPVILL 0.057  
178 78 QPHGGGW 0.055  
179 70 QPHGGGW 0.055  
**180 62 QPHGGGW 0.055**  
181 86 QPHGGGG 0.055

144 201 FTETDIK 0.099  
145 79 PHGGGWG 0.096  
146 71 PHGGGWG 0.096  
147 41 YPGQGSP 0.094  
148 152 YYRENNY 0.090  
149 153 YRENNYR 0.090  
150 155 ENMYRYP 0.090  
151 210 ERVVEQM 0.089  
152 209 MERVVEQ 0.088  
153 204 TDIKIME 0.082  
154 199 ENFTETD 0.081  
155 3 KSHIGSW 0.081  
156 241 PPVILLI 0.075  
157 200 NFTETDI 0.074  
158 159 RYPNQVY 0.073  
159 163 QVYYRPV 0.073  
160 45 GSPGGNR 0.071  
161 54 PQGGGGW 0.069  
162 44 QGSPGGN 0.067  
163 43 GQGSPGG 0.067  
164 35 NTGGSRY 0.066  
165 36 TGGSRYP 0.066  
166 223 RESQAYY 0.065  
167 192 VTTTTKG 0.063  
168 222 QRESQAY 0.061  
169 221 YQRESQA 0.059  
170 220 QYQRESQ 0.059  
171 170 DRYSNQN 0.058  
172 240 SPPVILL 0.057  
173 78 QPHGGGW 0.055  
174 70 QPHGGGW 0.055  
175 86 QPHGGGG 0.055  
**176 61 GQPHGGS 0.055**  
177 85 GQPHGGG 0.055  
178 77 GQPHGGG 0.055  
179 21 VGLCKKR 0.054  
**180 62 QPHGGSR 0.053**

182 85 GQPHGGG 0.055  
183 77 GQPHGGG 0.055  
**184 69 GQPHGGG 0.055**  
**185 61 GQPHGGG 0.055**  
186 21 VGLCKKR 0.054  
187 219 TQYQRES 0.049  
188 196 TKGENFT 0.048  
189 197 KGENFTE 0.048  
190 100 SQWNKPR 0.044  
191 239 SSPPVIL 0.044  
192 205 DIKIMER 0.042  
193 87 PHGGGGW 0.041  
194 238 FSSPPVI 0.041  
195 158 YRYPNQV 0.040  
196 156 NMYRYPN 0.040  
197 157 MYRYPNQ 0.040  
198 139 RPLIHFG 0.037  
199 145 GNDYEDR 0.033  
200 137 MSRPLIH 0.033  
201 207 KIMERVV 0.031  
202 148 YEDRYR 0.026  
203 203 ETDIKIM 0.025  
204 136 AMSRPLI 0.025  
205 193 TTTTKGE 0.024  
206 29 KPGGGWN 0.024  
207 206 IKIMERV 0.023  
208 195 TTKGENF 0.021  
209 47 PGGNRYP 0.021  
210 48 GGNRYPP 0.021  
211 165 YYRPVDR 0.020  
212 237 LFSSPPV 0.020  
213 138 SRPLIHF 0.020  
214 40 RYPGQGS 0.020  
215 135 SAMSRPL 0.019  
216 39 SRYPGQG 0.019  
217 52 YPPQGGG 0.017  
218 46 SPGGNRY 0.014

181 219 TQYQRES 0.049  
182 196 TKGENFT 0.048  
183 197 KGENFTE 0.048  
184 100 SQWNKPR 0.044  
185 239 SSPPVIL 0.044  
186 205 DIKIMER 0.042  
187 87 PHGGGGW 0.041  
188 238 FSSPPVI 0.041  
189 158 YRYPNQV 0.040  
190 156 NMYRYPN 0.040  
191 157 MYRYPNQ 0.040  
192 139 RPLIHFG 0.037  
193 145 GNDYEDR 0.033  
194 137 MSRPLIH 0.033  
195 207 KIMERVV 0.031  
**196 65 GGSRDQP 0.029**  
197 148 YEDRYR 0.026  
198 203 ETDIKIM 0.025  
199 136 AMSRPLI 0.025  
200 193 TTTTKGE 0.024  
201 29 KPGGGWN 0.024  
202 206 IKIMERV 0.023  
203 195 TTKGENF 0.021  
204 47 PGGNRYP 0.021  
205 48 GGNRYPP 0.021  
206 165 YYRPVDR 0.020  
**207 69 DQPHGGG 0.020**  
208 237 LFSSPPV 0.020  
209 138 SRPLIHF 0.020  
210 40 RYPGQGS 0.020  
211 135 SAMSRPL 0.019  
212 39 SRYPGQG 0.019  
213 52 YPPQGGG 0.017  
**214 64 HGGSRDQ 0.017**  
215 46 SPGGNRY 0.014  
216 38 GSRYPGQ 0.014  
217 37 GGSRYPG 0.014

219 38 GSRYPGQ 0.014  
220 37 GGSRYPG 0.014  
221 168 PVDRYSN 0.014  
222 151 RYYRENM 0.014  
223 154 RENMYRY 0.013  
224 109 KTNMKHV 0.013  
225 53 PPQGGGG 0.012  
226 194 TTTKGEN 0.012  
227 42 PGQGSPG 0.011  
228 202 TETDIKI 0.010  
229 101 QWNKPRK 0.009  
230 146 NDYEDRY 0.006  
231 147 DYEDRY Y 0.006  
232 50 NRYPPQG 0.005  
233 22 GLCKKRP 0.004  
234 49 GNRYPQ 0.003  
235 149 EDRYYRE 0.003  
236 150 DRYREN 0.003  
237 51 RYPPQGG 0.003  
238 166 YRPVDRY 0.003  
239 167 RPVDRYS 0.003  
240 108 PKTNMKH 0.003  
241 107 KPKNMK 0.003  
242 28 PKPGGGW 0.002  
243 102 WNKPRKP 0.001  
244 23 LCKKRPK 0.001  
245 106 RKPKNM 0.000  
246 27 RPKPGGG 0.000  
247 24 CKKRPKP 0.000  
248 103 NKPRKPK 0.000  
249 26 KRPKPGG 0.000  
250 105 PRKPKTN 0.000  
251 104 KPRKPKT 0.000  
252 25 KKRPKPG 0.000

218 168 PVDRYSN 0.014  
219 151 RYYRENM 0.014  
220 154 RENMYRY 0.013  
221 109 KTNMKHV 0.013  
222 53 PPQGGGG 0.012  
223 194 TTTKGEN 0.012  
224 42 PGQGSPG 0.011  
225 202 TETDIKI 0.010  
226 101 QWNKPRK 0.009  
**227 63 PHGGSRD 0.008**  
228 146 NDYEDRY 0.006  
229 147 DYEDRY Y 0.006  
**230 66 GSRDQPH 0.005**  
231 50 NRYPPQG 0.005  
232 22 GLCKKRP 0.004  
**233 68 RDQPHGG 0.004**  
**234 67 SRDQPHG 0.004**  
235 49 GNRYPQ 0.003  
236 149 EDRYYRE 0.003  
237 150 DRYREN 0.003  
238 51 RYPPQGG 0.003  
239 166 YRPVDRY 0.003  
240 167 RPVDRYS 0.003  
241 108 PKTNMKH 0.003  
242 107 KPKNMK 0.003  
243 28 PKPGGGW 0.002  
244 102 WNKPRKP 0.001  
245 23 LCKKRPK 0.001  
246 106 RKPKNM 0.000  
247 27 RPKPGGG 0.000  
248 24 CKKRPKP 0.000  
249 103 NKPRKPK 0.000  
250 26 KRPKPGG 0.000  
251 105 PRKPKTN 0.000  
252 104 KPRKPKT 0.000

## Probability Score

Reference Novel Variant substituted sequence -H159

|    |     |         |       |
|----|-----|---------|-------|
| 1  | 10  | ILVLFVA | 0.941 |
| 2  | 9   | WILVLFV | 0.934 |
| 3  | 12  | VLVAMW  | 0.925 |
| 4  | 11  | LVLVAM  | 0.923 |
| 5  | 250 | LIFLIVG | 0.919 |
| 6  | 13  | LVAMWS  | 0.918 |
| 7  | 251 | IFLIVG  | 0.898 |
| 8  | 182 | CVNITVK | 0.898 |
| 9  | 120 | AAGAVVG | 0.896 |
| 10 | 14  | FVAMWSD | 0.893 |
| 11 | 249 | FLIFLIV | 0.886 |
| 12 | 8   | SWILVLF | 0.881 |
| 13 | 174 | NQNNFVH | 0.876 |
| 14 | 233 | ASVILFS | 0.867 |
| 15 | 243 | VILLISF | 0.856 |
| 16 | 247 | ISFLIFL | 0.853 |
| 17 | 121 | AGAVVGG | 0.852 |
| 18 | 7   | GSWILVL | 0.851 |
| 19 | 123 | AVVGGLG | 0.832 |
| 20 | 115 | VAGAAAA | 0.826 |
| 21 | 119 | AAAGAVV | 0.826 |
| 22 | 252 | FLIVG   | 0.814 |
| 23 | 235 | VILFSSP | 0.808 |
| 24 | 234 | SVILFSS | 0.808 |
| 25 | 6   | IGSWILV | 0.805 |
| 26 | 246 | LISFLIF | 0.801 |
| 27 | 244 | ILLISFL | 0.801 |
| 28 | 122 | GAVVGGL | 0.793 |
| 29 | 175 | QNNFVHD | 0.792 |
| 30 | 248 | SFLIFLI | 0.792 |
| 31 | 232 | GASVILF | 0.777 |
| 32 | 124 | VVGGLGG | 0.768 |



33 212 VVEQMCI 0.729  
34 245 LLISFLI 0.725  
35 116 AGAAAAG 0.721  
36 118 AAAAGAV 0.721  
37 5 HIGSWIL 0.714  
38 173 SNQNNFV 0.714  
39 114 HVAGAAA 0.711  
40 217 CITQYQR 0.678  
41 216 MCITQYQ 0.676  
42 178 FVHDCVN 0.665  
43 215 QMCITQY 0.661  
44 213 VEQMCIT 0.660  
45 172 YSNQNNF 0.658  
46 225 SQAYYQR 0.650  
47 141 LIHFGND 0.647  
48 117 GAAAAGA 0.633  
49 15 VAMWSDV 0.613  
50 16 AMWSDVG 0.613  
51 179 VHDCVNI 0.606  
52 131 YMLGSAM 0.552  
53 4 SHIGSWI 0.550  
54 125 VGGLGGY 0.546  
55 98 SHSQWNK 0.545  
56 132 MLGSAMS 0.532  
57 181 DCVNITV 0.531  
58 55 QGGGGWG 0.530  
59 92 GWGQGGG 0.530  
60 91 GGWGQGG 0.530  
61 81 GGGWGQP 0.530  
62 73 GGGWGQP 0.530  
63 57 GGGWGQP 0.530  
64 90 GGGWGQG 0.530  
65 180 HDCVNIT 0.526  
66 93 WGQGGSH 0.523  
67 128 LGGYMLG 0.522  
68 17 MWSDVGL 0.513  
69 177 NFVHDCV 0.511

70 183 VNITVKQ 0.509  
71 18 WSDVGLC 0.506  
72 176 NNFVHDC 0.501  
73 242 PVILLIS 0.497  
74 33 GWNTGGS 0.491  
75 32 GGWNTGG 0.491  
76 31 GGGWNTG 0.491  
77 34 WNTGGSR 0.484  
78 127 GLGGYML 0.458  
79 129 GGYMLGS 0.458  
80 89 GGGGWGQ 0.456  
81 56 GGGGWGQ 0.456  
82 97 GSHSQWN 0.454  
83 133 LGSAMSR 0.453  
84 130 GYMLGSA 0.450  
85 162 NQVYYRP 0.414  
86 80 HGGGWGQ 0.396  
87 72 HGGGWGQ 0.396  
88 88 HGGGGWG 0.396  
89 126 GGLGGYM 0.387  
90 19 SDVGLCK 0.384  
91 160 YPNQVYY 0.378  
92 161 PNQVYYR 0.378  
93 214 EQMCITQ 0.360  
94 224 ESQAYYQ 0.350  
95 184 NITVKQH 0.337  
96 231 RGASVIL 0.335  
97 142 IHFGNDY 0.334  
98 189 QHTVTTT 0.332  
99 208 IMERVVE 0.330  
100 155 ENMYHYP 0.292  
101 187 VKQHTVT 0.276  
102 111 NMKHVAG 0.273  
103 143 HFGNDYE 0.267  
104 226 QAYYQRG 0.265  
105 94 GQGGSHS 0.257  
106 230 QRGASVI 0.255

107 95 QGGSHSQ 0.251  
108 96 GGSHSQW 0.251  
109 211 RVVEQMC 0.251  
110 1 MVKSHIG 0.249  
111 159 HYPNQVY 0.248  
112 191 TVTTTTK 0.231  
113 190 HTVTTTT 0.227  
114 113 KHVAGAA 0.226  
115 185 ITVKQHT 0.216  
116 228 YYQRGAS 0.211  
117 227 AYYQRGA 0.211  
118 218 ITQYQRE 0.208  
119 112 MKHVAGA 0.206  
120 171 RYSNQNN 0.200  
121 2 VKSHIGS 0.199  
122 236 ILFSSPP 0.198  
123 99 HSQWNKP 0.180  
124 140 PLIHFGN 0.170  
125 110 TNMKHVA 0.166  
126 30 PGGGWNT 0.164  
127 82 GGWGQPH 0.154  
128 74 GGWGQPH 0.154  
129 58 GGWGQPH 0.154  
130 144 FGNDYED 0.154  
131 229 YQRGASV 0.153  
132 158 YHYPNQV 0.148  
133 156 NMYHYPN 0.146  
134 157 MYHYPNQ 0.146  
135 164 VYYRPVD 0.139  
136 84 WGQPHGG 0.125  
137 76 WGQPHGG 0.125  
138 60 WGQPHGG 0.125  
139 83 GWGQPHG 0.125  
140 75 GWGQPHG 0.125  
141 59 GWGQPHG 0.125  
142 169 VDRYSNQ 0.111  
143 134 GSAMSRP 0.107

144 20 DVGLCKK 0.103  
145 186 TVKQHTV 0.100  
146 188 KQHTVTT 0.100  
147 198 GENFTET 0.099  
148 201 FTETDIK 0.099  
149 79 PHGGGWG 0.096  
150 71 PHGGGWG 0.096  
151 41 YPGQGSP 0.094  
152 152 YYRENMY 0.090  
153 153 YRENMYH 0.090  
154 210 ERVVEQM 0.089  
155 209 MERVVEQ 0.088  
156 204 TDIKIME 0.082  
157 199 ENFTETD 0.081  
158 3 KSHIGSW 0.081  
159 241 PPVILLI 0.075  
160 200 NFTETDI 0.074  
161 163 QVYYRPV 0.073  
162 45 GSPGGNR 0.071  
163 54 PQGGGGW 0.069  
164 44 QGSPGGN 0.067  
165 43 GQGSPGG 0.067  
166 35 NTGGSRY 0.066  
167 36 TGGSRYP 0.066  
168 223 RESQAYY 0.065  
169 192 VTTTTKG 0.063  
170 222 QRESQAY 0.061  
171 221 YQRESQA 0.059  
172 220 QYQRESQ 0.059  
173 170 DRYSNQN 0.058  
174 240 SPPVILL 0.057  
175 78 QPHGGGW 0.055  
176 70 QPHGGGW 0.055  
177 86 QPHGGGG 0.055  
178 61 GQPHGGS 0.055  
179 85 GQPHGGG 0.055  
180 77 GQPHGGG 0.055

|     |     |         |       |
|-----|-----|---------|-------|
| 181 | 21  | VGLCKKR | 0.054 |
| 182 | 62  | QPHGGSR | 0.053 |
| 183 | 154 | RENMYHY | 0.051 |
| 184 | 219 | TQYQRES | 0.049 |
| 185 | 196 | TKGENFT | 0.048 |
| 186 | 197 | KGENFTE | 0.048 |
| 187 | 100 | SQWNKPR | 0.044 |
| 188 | 239 | SSPPVIL | 0.044 |
| 189 | 205 | DIKIMER | 0.042 |
| 190 | 87  | PHGGGGW | 0.041 |
| 191 | 238 | FSSPPVI | 0.041 |
| 192 | 139 | RPLIHFG | 0.037 |
| 193 | 145 | GNDYEDR | 0.033 |
| 194 | 137 | MSRPLIH | 0.033 |
| 195 | 207 | KIMERVV | 0.031 |
| 196 | 65  | GGSRDQP | 0.029 |
| 197 | 148 | YEDRYR  | 0.026 |
| 198 | 203 | ETDIKIM | 0.025 |
| 199 | 136 | AMSRPLI | 0.025 |
| 200 | 193 | TTTTKGE | 0.024 |
| 201 | 29  | KPGGGWN | 0.024 |
| 202 | 206 | IKIMERV | 0.023 |
| 203 | 195 | TTKGENF | 0.021 |
| 204 | 47  | PGGNRYP | 0.021 |
| 205 | 48  | GGNRYPP | 0.021 |
| 206 | 165 | YYRPVDR | 0.020 |
| 207 | 69  | DQPHGGG | 0.020 |
| 208 | 237 | LFSSPPV | 0.020 |
| 209 | 138 | SRPLIHF | 0.020 |
| 210 | 40  | RYPGQGS | 0.020 |
| 211 | 135 | SAMSRPL | 0.019 |
| 212 | 39  | SRYPGQG | 0.019 |
| 213 | 52  | YPPQGGG | 0.017 |
| 214 | 64  | HGGSRDQ | 0.017 |
| 215 | 46  | SPGGNRY | 0.014 |
| 216 | 38  | GSRYPGQ | 0.014 |
| 217 | 37  | GGSRYPG | 0.014 |

218 168 PVDRYSN 0.014  
219 151 RYYRENM 0.014  
220 109 KTNMKHV 0.013  
221 53 PPQGGGG 0.012  
222 194 TTTKGEN 0.012  
223 42 PGQGSPG 0.011  
224 202 TETDIKI 0.010  
225 101 QWNKPRK 0.009  
226 63 PHGGSRD 0.008  
227 146 NDYEDRY 0.006  
228 147 DYEDRY Y 0.006  
229 66 GSRDQPH 0.005  
230 50 NRYPPQG 0.005  
231 22 GLCKKRP 0.004  
232 68 RDQPHGG 0.004  
233 67 SRDQPHG 0.004  
234 49 GNRYP PQ 0.003  
235 149 EDRYYRE 0.003  
236 150 DRYREN 0.003  
237 51 RYPPQGG 0.003  
238 166 YRPVDRY 0.003  
239 167 RPVDRYS 0.003  
240 108 PKTNMKH 0.003  
241 107 KPKNMK 0.003  
242 28 PKPGGGW 0.002  
243 102 WNKPRKP 0.001  
244 23 LCKKRPK 0.001  
245 106 RKPKNM 0.000  
246 27 RPKPGGG 0.000  
247 24 CKKRPKP 0.000  
248 103 NKPRKPK 0.000  
249 26 KRPKPGG 0.000  
250 105 PRKPKTN 0.000  
251 104 KPRKPKT 0.000  
252 25 KKRPKPG 0.000



**Table 3 Ligand binding affinity probability**

Wild Type

r=MET;n=1 :prob=0.026  
r=VAL;n=2 :prob=0.026  
r=LYS;n=3 :prob=0.027  
r=SER;n=4 :prob=0.026  
r=HIS;n=5 :prob=0.027  
r=ILE;n=6 :prob=0.026  
r=GLY;n=7 :prob=0.026  
r=SER;n=8 :prob=0.027  
r=TRP;n=9 :prob=0.031  
r=ILE;n=10 :prob=0.028  
r=LEU;n=11 :prob=0.027  
r=VAL;n=12 :prob=0.027  
r=LEU;n=13 :prob=0.026  
r=PHE;n=14 :prob=0.027  
r=VAL;n=15 :prob=0.030  
r=ALA;n=16 :prob=0.028  
r=MET;n=17 :prob=0.027  
r=TRP;n=18 :prob=0.026  
r=SER;n=19 :prob=0.026  
r=ASP;n=20 :prob=0.027  
r=VAL;n=21 :prob=0.033  
r=GLY;n=22 :prob=0.037  
r=LEU;n=23 :prob=0.035  
r=CYS;n=24 :prob=0.029  
r=LYS;n=25 :prob=0.035  
r=LYS;n=26 :prob=0.027  
r=ARG;n=27 :prob=0.026  
r=PRO;n=28 :prob=0.026  
r=LYS;n=29 :prob=0.026  
r=PRO;n=30 :prob=0.026  
r=GLY;n=31 :prob=0.026  
r=GLY;n=32 :prob=0.027  
r=GLY;n=33 :prob=0.026  
r=TRP;n=34 :prob=0.026  
r=ASN;n=35 :prob=0.027  
r=THR;n=36 :prob=0.026  
r=GLY;n=37 :prob=0.026  
r=GLY;n=38 :prob=0.026  
r=SER;n=39 :prob=0.027  
r=ARG;n=40 :prob=0.030  
r=TYR;n=41 :prob=0.033

Variant

r=MET;n=1 :prob=0.026  
r=VAL;n=2 :prob=0.026  
r=LYS;n=3 :prob=0.027  
r=SER;n=4 :prob=0.026  
r=HIS;n=5 :prob=0.026  
r=ILE;n=6 :prob=0.026  
r=GLY;n=7 :prob=0.026  
r=SER;n=8 :prob=0.026  
r=TRP;n=9 :prob=0.026  
r=ILE;n=10 :prob=0.027  
r=LEU;n=11 :prob=0.026  
r=VAL;n=12 :prob=0.027  
r=LEU;n=13 :prob=0.027  
r=PHE;n=14 :prob=0.032  
r=VAL;n=15 :prob=0.027  
r=ALA;n=16 :prob=0.026  
r=MET;n=17 :prob=0.026  
r=TRP;n=18 :prob=0.027  
r=SER;n=19 :prob=0.026  
r=ASP;n=20 :prob=0.026  
r=VAL;n=21 :prob=0.026  
r=GLY;n=22 :prob=0.027  
r=LEU;n=23 :prob=0.026  
r=CYS;n=24 :prob=0.026  
r=LYS;n=25 :prob=0.026  
r=LYS;n=26 :prob=0.026  
r=ARG;n=27 :prob=0.026  
r=PRO;n=28 :prob=0.026  
r=LYS;n=29 :prob=0.027  
r=PRO;n=30 :prob=0.026  
r=GLY;n=31 :prob=0.026  
r=GLY;n=32 :prob=0.026  
r=GLY;n=33 :prob=0.026  
r=TRP;n=34 :prob=0.026  
r=ASN;n=35 :prob=0.026  
r=THR;n=36 :prob=0.026  
r=GLY;n=37 :prob=0.026  
r=GLY;n=38 :prob=0.026  
r=SER;n=39 :prob=0.026  
r=ARG;n=40 :prob=0.026  
r=TYR;n=41 :prob=0.026



r=PRO;n=42 :prob=0.042  
r=GLY;n=43 :prob=0.037  
r=GLN;n=44 :prob=0.030  
r=GLY;n=45 :prob=0.029  
r=SER;n=46 :prob=0.027  
r=PRO;n=47 :prob=0.027  
r=GLY;n=48 :prob=0.027  
r=GLY;n=49 :prob=0.026  
r=ASN;n=50 :prob=0.026  
r=ARG;n=51 :prob=0.027  
r=TYR;n=52 :prob=0.027  
r=PRO;n=53 :prob=0.026  
r=PRO;n=54 :prob=0.026  
r=GLN;n=55 :prob=0.026  
r=GLY;n=56 :prob=0.026  
r=GLY;n=57 :prob=0.026  
r=GLY;n=58 :prob=0.027  
r=GLY;n=59 :prob=0.030  
r=TRP;n=60 :prob=0.032  
r=GLY;n=61 :prob=0.039  
r=GLN;n=62 :prob=0.033  
r=PRO;n=63 :prob=0.028  
r=HIS;n=64 :prob=0.026  
r=GLY;n=65 :prob=0.026  
r=GLY;n=66 :prob=0.026  
r=GLY;n=67 :prob=0.027  
r=TRP;n=68 :prob=0.038  
r=GLY;n=69 :prob=0.026  
r=GLN;n=70 :prob=0.026  
r=PRO;n=71 :prob=0.026  
r=HIS;n=72 :prob=0.026  
r=GLY;n=73 :prob=0.026  
r=GLY;n=74 :prob=0.026  
r=GLY;n=75 :prob=0.026  
r=TRP;n=76 :prob=0.026  
r=GLY;n=77 :prob=0.026  
r=GLN;n=78 :prob=0.026  
r=PRO;n=79 :prob=0.026  
r=HIS;n=80 :prob=0.028  
r=GLY;n=81 :prob=0.028  
r=GLY;n=82 :prob=0.029  
r=GLY;n=83 :prob=0.028  
r=TRP;n=84 :prob=0.028  
r=GLY;n=85 :prob=0.026

r=PRO;n=42 :prob=0.026  
r=GLY;n=43 :prob=0.026  
r=GLN;n=44 :prob=0.026  
r=GLY;n=45 :prob=0.026  
r=SER;n=46 :prob=0.027  
r=PRO;n=47 :prob=0.027  
r=GLY;n=48 :prob=0.027  
r=GLY;n=49 :prob=0.026  
r=ASN;n=50 :prob=0.026  
r=ARG;n=51 :prob=0.028  
r=TYR;n=52 :prob=0.033  
r=PRO;n=53 :prob=0.032  
r=PRO;n=54 :prob=0.033  
r=GLN;n=55 :prob=0.027  
r=GLY;n=56 :prob=0.027  
r=GLY;n=57 :prob=0.028  
r=GLY;n=58 :prob=0.027  
r=GLY;n=59 :prob=0.029  
r=TRP;n=60 :prob=0.028  
r=GLY;n=61 :prob=0.027  
r=GLN;n=62 :prob=0.026  
r=PRO;n=63 :prob=0.026  
r=HIS;n=64 :prob=0.026  
r=GLY;n=65 :prob=0.026  
r=GLY;n=66 :prob=0.026  
r=SER;n=67 :prob=0.026  
r=ARG;n=68 :prob=0.026  
r=ASP;n=69 :prob=0.026  
r=GLN;n=70 :prob=0.026  
r=PRO;n=71 :prob=0.026  
r=HIS;n=72 :prob=0.026  
r=GLY;n=73 :prob=0.026  
r=GLY;n=74 :prob=0.026  
r=GLY;n=75 :prob=0.026  
r=TRP;n=76 :prob=0.026  
r=GLY;n=77 :prob=0.029  
r=GLN;n=78 :prob=0.027  
r=PRO;n=79 :prob=0.030  
r=HIS;n=80 :prob=0.030  
r=GLY;n=81 :prob=0.034  
r=GLY;n=82 :prob=0.035  
r=GLY;n=83 :prob=0.033  
r=TRP;n=84 :prob=0.030  
r=GLY;n=85 :prob=0.031

|                         |                         |
|-------------------------|-------------------------|
| r=GLN;n=86 :prob=0.027  | r=GLN;n=86 :prob=0.034  |
| r=PRO;n=87 :prob=0.026  | r=PRO;n=87 :prob=0.027  |
| r=HIS;n=88 :prob=0.026  | r=HIS;n=88 :prob=0.030  |
| r=GLY;n=89 :prob=0.026  | r=GLY;n=89 :prob=0.026  |
| r=GLY;n=90 :prob=0.026  | r=GLY;n=90 :prob=0.026  |
| r=GLY;n=91 :prob=0.026  | r=GLY;n=91 :prob=0.026  |
| r=GLY;n=92 :prob=0.026  | r=GLY;n=92 :prob=0.026  |
| r=TRP;n=93 :prob=0.026  | r=TRP;n=93 :prob=0.026  |
| r=GLY;n=94 :prob=0.026  | r=GLY;n=94 :prob=0.026  |
| r=GLN;n=95 :prob=0.026  | r=GLN;n=95 :prob=0.026  |
| r=GLY;n=96 :prob=0.026  | r=GLY;n=96 :prob=0.026  |
| r=GLY;n=97 :prob=0.026  | r=GLY;n=97 :prob=0.026  |
| r=SER;n=98 :prob=0.026  | r=SER;n=98 :prob=0.026  |
| r=HIS;n=99 :prob=0.026  | r=HIS;n=99 :prob=0.026  |
| r=SER;n=100 :prob=0.026 | r=SER;n=100 :prob=0.027 |
| r=GLN;n=101 :prob=0.026 | r=GLN;n=101 :prob=0.028 |
| r=TRP;n=102 :prob=0.026 | r=TRP;n=102 :prob=0.030 |
| r=ASN;n=103 :prob=0.027 | r=ASN;n=103 :prob=0.032 |
| r=LYS;n=104 :prob=0.027 | r=LYS;n=104 :prob=0.033 |
| r=PRO;n=105 :prob=0.029 | r=PRO;n=105 :prob=0.034 |
| r=SER;n=106 :prob=0.028 | r=ARG;n=106 :prob=0.031 |
| r=LYS;n=107 :prob=0.028 | r=LYS;n=107 :prob=0.032 |
| r=PRO;n=108 :prob=0.027 | r=PRO;n=108 :prob=0.030 |
| r=LYS;n=109 :prob=0.026 | r=LYS;n=109 :prob=0.029 |
| r=THR;n=110 :prob=0.026 | r=THR;n=110 :prob=0.030 |
| r=ASN;n=111 :prob=0.026 | r=ASN;n=111 :prob=0.028 |
| r=MET;n=112 :prob=0.026 | r=MET;n=112 :prob=0.027 |
| r=LYS;n=113 :prob=0.026 | r=LYS;n=113 :prob=0.027 |
| r=HIS;n=114 :prob=0.026 | r=HIS;n=114 :prob=0.027 |
| r=VAL;n=115 :prob=0.026 | r=VAL;n=115 :prob=0.027 |
| r=ALA;n=116 :prob=0.026 | r=ALA;n=116 :prob=0.027 |
| r=GLY;n=117 :prob=0.026 | r=GLY;n=117 :prob=0.026 |
| r=ALA;n=118 :prob=0.026 | r=ALA;n=118 :prob=0.027 |
| r=ALA;n=119 :prob=0.027 | r=ALA;n=119 :prob=0.027 |
| r=ALA;n=120 :prob=0.029 | r=ALA;n=120 :prob=0.026 |
| r=ALA;n=121 :prob=0.027 | r=ALA;n=121 :prob=0.026 |
| r=GLY;n=122 :prob=0.026 | r=GLY;n=122 :prob=0.027 |
| r=ALA;n=123 :prob=0.027 | r=ALA;n=123 :prob=0.027 |
| r=VAL;n=124 :prob=0.028 | r=VAL;n=124 :prob=0.027 |
| r=VAL;n=125 :prob=0.042 | r=VAL;n=125 :prob=0.069 |
| r=GLY;n=126 :prob=0.028 | r=GLY;n=126 :prob=0.030 |
| r=GLY;n=127 :prob=0.030 | r=GLY;n=127 :prob=0.030 |
| r=LEU;n=128 :prob=0.034 | r=LEU;n=128 :prob=0.066 |
| r=GLY;n=129 :prob=0.041 | r=GLY;n=129 :prob=0.064 |

r=GLY;n=130 :prob=0.034  
r=TYR;n=131 :prob=0.047  
r=MET;n=132 :prob=0.037  
r=LEU;n=133 :prob=0.040  
r=GLY;n=134 :prob=0.030  
r=SER;n=135 :prob=0.027  
r=ALA;n=136 :prob=0.027  
r=MET;n=137 :prob=0.026  
r=SER;n=138 :prob=0.026  
r=ARG;n=139 :prob=0.026  
r=PRO;n=140 :prob=0.026  
r=LEU;n=141 :prob=0.026  
r=ILE;n=142 :prob=0.027  
r=HIS;n=143 :prob=0.026  
r=PHE;n=144 :prob=0.026  
r=GLY;n=145 :prob=0.026  
r=ASN;n=146 :prob=0.026  
r=ASP;n=147 :prob=0.026  
r=TYR;n=148 :prob=0.026  
r=GLU;n=149 :prob=0.027  
r=ASP;n=150 :prob=0.026  
r=ARG;n=151 :prob=0.026  
r=TYR;n=152 :prob=0.027  
r=TYR;n=153 :prob=0.027  
r=ARG;n=154 :prob=0.026  
r=GLU;n=155 :prob=0.026  
r=ASN;n=156 :prob=0.027  
r=MET;n=157 :prob=0.026  
r=TYR;n=158 :prob=0.026  
r=ARG;n=159 :prob=0.026  
r=TYR;n=160 :prob=0.026  
r=PRO;n=161 :prob=0.026  
r=ASN;n=162 :prob=0.026  
r=GLN;n=163 :prob=0.029  
r=VAL;n=164 :prob=0.028  
r=TYR;n=165 :prob=0.038  
r=TYR;n=166 :prob=0.029  
r=ARG;n=167 :prob=0.028  
r=PRO;n=168 :prob=0.029  
r=VAL;n=169 :prob=0.026  
r=ASP;n=170 :prob=0.027  
r=ARG;n=171 :prob=0.026  
r=TYR;n=172 :prob=0.026  
r=SER;n=173 :prob=0.026

r=GLY;n=130 :prob=0.030  
r=TYR;n=131 :prob=0.071  
r=MET;n=132 :prob=0.031  
r=LEU;n=133 :prob=0.031  
r=GLY;n=134 :prob=0.028  
r=SER;n=135 :prob=0.026  
r=ALA;n=136 :prob=0.026  
r=MET;n=137 :prob=0.026  
r=SER;n=138 :prob=0.026  
r=ARG;n=139 :prob=0.026  
r=PRO;n=140 :prob=0.026  
r=LEU;n=141 :prob=0.026  
r=ILE;n=142 :prob=0.026  
r=HIS;n=143 :prob=0.026  
r=PHE;n=144 :prob=0.026  
r=GLY;n=145 :prob=0.026  
r=ASN;n=146 :prob=0.026  
r=ASP;n=147 :prob=0.026  
r=TYR;n=148 :prob=0.026  
r=GLU;n=149 :prob=0.026  
r=ASP;n=150 :prob=0.026  
r=ARG;n=151 :prob=0.026  
r=TYR;n=152 :prob=0.031  
r=TYR;n=153 :prob=0.026  
r=ARG;n=154 :prob=0.026  
r=GLU;n=155 :prob=0.026  
r=ASN;n=156 :prob=0.026  
r=MET;n=157 :prob=0.026  
r=TYR;n=158 :prob=0.026  
r=HIS;n=159 :prob=0.026  
r=TYR;n=160 :prob=0.026  
r=PRO;n=161 :prob=0.026  
r=ASN;n=162 :prob=0.026  
r=GLN;n=163 :prob=0.027  
r=VAL;n=164 :prob=0.027  
r=TYR;n=165 :prob=0.063  
r=TYR;n=166 :prob=0.027  
r=ARG;n=167 :prob=0.026  
r=PRO;n=168 :prob=0.026  
r=VAL;n=169 :prob=0.026  
r=ASP;n=170 :prob=0.026  
r=ARG;n=171 :prob=0.026  
r=TYR;n=172 :prob=0.026  
r=SER;n=173 :prob=0.026

r=ASN;n=174 :prob=0.026  
r=GLN;n=175 :prob=0.026  
r=ASN;n=176 :prob=0.026  
r=ASN;n=177 :prob=0.026  
r=PHE;n=178 :prob=0.026  
r=VAL;n=179 :prob=0.026  
r=HIS;n=180 :prob=0.026  
r=ASP;n=181 :prob=0.026  
r=CYS;n=182 :prob=0.026  
r=VAL;n=183 :prob=0.026  
r=ASN;n=184 :prob=0.026  
r=ILE;n=185 :prob=0.039  
r=THR;n=186 :prob=0.026  
r=VAL;n=187 :prob=0.026  
r=LYS;n=188 :prob=0.031  
r=GLN;n=189 :prob=0.041  
r=HIS;n=190 :prob=0.026  
r=THR;n=191 :prob=0.026  
r=VAL;n=192 :prob=0.031  
r=THR;n=193 :prob=0.031  
r=THR;n=194 :prob=0.026  
r=THR;n=195 :prob=0.026  
r=THR;n=196 :prob=0.026  
r=LYS;n=197 :prob=0.026  
r=GLY;n=198 :prob=0.026  
r=GLU;n=199 :prob=0.026  
r=ASN;n=200 :prob=0.026  
r=PHE;n=201 :prob=0.026  
r=THR;n=202 :prob=0.026  
r=GLU;n=203 :prob=0.026  
r=THR;n=204 :prob=0.026  
r=ASP;n=205 :prob=0.026  
r=ILE;n=206 :prob=0.045  
r=LYS;n=207 :prob=0.510  
r=ILE;n=208 :prob=0.046  
r=MET;n=209 :prob=0.027  
r=GLU;n=210 :prob=0.118  
r=ARG;n=211 :prob=0.045  
r=VAL;n=212 :prob=0.026  
r=VAL;n=213 :prob=0.026  
r=GLU;n=214 :prob=0.026  
r=GLN;n=215 :prob=0.026  
r=MET;n=216 :prob=0.026  
r=CYS;n=217 :prob=0.026

r=ASN;n=174 :prob=0.026  
r=GLN;n=175 :prob=0.026  
r=ASN;n=176 :prob=0.026  
r=ASN;n=177 :prob=0.026  
r=PHE;n=178 :prob=0.026  
r=VAL;n=179 :prob=0.026  
r=HIS;n=180 :prob=0.026  
r=ASP;n=181 :prob=0.026  
r=CYS;n=182 :prob=0.026  
r=VAL;n=183 :prob=0.026  
r=ASN;n=184 :prob=0.026  
r=ILE;n=185 :prob=0.116  
r=THR;n=186 :prob=0.026  
r=VAL;n=187 :prob=0.026  
r=LYS;n=188 :prob=0.058  
r=GLN;n=189 :prob=0.510  
r=HIS;n=190 :prob=0.027  
r=THR;n=191 :prob=0.026  
r=VAL;n=192 :prob=0.058  
r=THR;n=193 :prob=0.058  
r=THR;n=194 :prob=0.026  
r=THR;n=195 :prob=0.026  
r=THR;n=196 :prob=0.026  
r=LYS;n=197 :prob=0.026  
r=GLY;n=198 :prob=0.026  
r=GLU;n=199 :prob=0.026  
r=ASN;n=200 :prob=0.026  
r=PHE;n=201 :prob=0.026  
r=THR;n=202 :prob=0.026  
r=GLU;n=203 :prob=0.026  
r=THR;n=204 :prob=0.026  
r=ASP;n=205 :prob=0.026  
r=ILE;n=206 :prob=0.026  
r=LYS;n=207 :prob=0.026  
r=ILE;n=208 :prob=0.036  
r=MET;n=209 :prob=0.026  
r=GLU;n=210 :prob=0.026  
r=ARG;n=211 :prob=0.031  
r=VAL;n=212 :prob=0.036  
r=VAL;n=213 :prob=0.026  
r=GLU;n=214 :prob=0.026  
r=GLN;n=215 :prob=0.026  
r=MET;n=216 :prob=0.026  
r=CYS;n=217 :prob=0.026

r=ILE;n=218 :prob=0.026  
r=THR;n=219 :prob=0.026  
r=GLN;n=220 :prob=0.026  
r=TYR;n=221 :prob=0.026  
r=GLN;n=222 :prob=0.026  
r=ARG;n=223 :prob=0.026  
r=GLU;n=224 :prob=0.026  
r=SER;n=225 :prob=0.026  
r=GLN;n=226 :prob=0.026  
r=ALA;n=227 :prob=0.026  
r=TYR;n=228 :prob=0.026  
r=TYR;n=229 :prob=0.026  
r=GLN;n=230 :prob=0.026  
r=ARG;n=231 :prob=0.026  
r=GLY;n=232 :prob=0.026  
r=ALA;n=233 :prob=0.026  
r=SER;n=234 :prob=0.026  
r=VAL;n=235 :prob=0.026  
r=ILE;n=236 :prob=0.026  
r=LEU;n=237 :prob=0.026  
r=PHE;n=238 :prob=0.026  
r=SER;n=239 :prob=0.026  
r=SER;n=240 :prob=0.026  
r=PRO;n=241 :prob=0.026  
r=PRO;n=242 :prob=0.026  
r=VAL;n=243 :prob=0.026  
r=ILE;n=244 :prob=0.026  
r=LEU;n=245 :prob=0.026  
r=LEU;n=246 :prob=0.026  
r=ILE;n=247 :prob=0.026  
r=SER;n=248 :prob=0.026  
r=PHE;n=249 :prob=0.026  
r=LEU;n=250 :prob=0.026  
r=ILE;n=251 :prob=0.026  
r=PHE;n=252 :prob=0.026  
r=LEU;n=253 :prob=0.026  
r=ILE;n=254 :prob=0.026  
r=VAL;n=255 :prob=0.026  
r=GLY;n=256 :prob=0.026

r=ILE;n=218 :prob=0.026  
r=THR;n=219 :prob=0.026  
r=GLN;n=220 :prob=0.026  
r=TYR;n=221 :prob=0.027  
r=GLN;n=222 :prob=0.026  
r=ARG;n=223 :prob=0.026  
r=GLU;n=224 :prob=0.026  
r=SER;n=225 :prob=0.027  
r=GLN;n=226 :prob=0.026  
r=ALA;n=227 :prob=0.026  
r=TYR;n=228 :prob=0.026  
r=TYR;n=229 :prob=0.026  
r=GLN;n=230 :prob=0.026  
r=ARG;n=231 :prob=0.026  
r=GLY;n=232 :prob=0.026  
r=ALA;n=233 :prob=0.026  
r=SER;n=234 :prob=0.026  
r=VAL;n=235 :prob=0.026  
r=ILE;n=236 :prob=0.026  
r=LEU;n=237 :prob=0.026  
r=PHE;n=238 :prob=0.026  
r=SER;n=239 :prob=0.026  
r=SER;n=240 :prob=0.026  
r=PRO;n=241 :prob=0.026  
r=PRO;n=242 :prob=0.026  
r=VAL;n=243 :prob=0.026  
r=ILE;n=244 :prob=0.026  
r=LEU;n=245 :prob=0.026  
r=LEU;n=246 :prob=0.026  
r=ILE;n=247 :prob=0.026  
r=SER;n=248 :prob=0.026  
r=PHE;n=249 :prob=0.026  
r=LEU;n=250 :prob=0.026  
r=ILE;n=251 :prob=0.026  
r=PHE;n=252 :prob=0.026  
r=LEU;n=253 :prob=0.026  
r=ILE;n=254 :prob=0.027  
r=VAL;n=255 :prob=0.026  
r=GLY;n=256 :prob=0.026

Metal Binding sites UniProtKB - P52113

| Position/<br>codon |
|--------------------|
| <a href="#">65</a> |
| <a href="#">66</a> |
| <a href="#">72</a> |
| <a href="#">73</a> |
| <a href="#">74</a> |
| <a href="#">80</a> |
| <a href="#">81</a> |
| <a href="#">82</a> |
| <a href="#">88</a> |
| <a href="#">90</a> |
| <a href="#">91</a> |
